# Supplementary material for: Acute Bronchitis and Bronchiolitis Infection in Children with Asthma and Allergic Rhinitis: A Retrospective Cohort Study Based on 5,027,486 Children in Taiwan
Source: MDPI journal article supplement (doi:10.3390/v15030810), 2023-03-22
Supplement: s1 [file s1]

Supplement Table S1. Incidence number and rate of acute bronchitis, asthma cohort to non-asthma cohort hazard ratio and allergic rhinitis cohort to non-allergic rhinitis cohort hazard ratio by urbanization level of resident and parental job

| Variable          | Asthma          |       |                |       | Hazard ratio (95% CI) |                  |
|-------------------|-----------------|-------|----------------|-------|-----------------------|------------------|
|                   | Yes (N=192126)  |       | No (N=192126)  |       |                       |                  |
|                   | n               | Rate  | n              | Rate  | Crude                 | Adjusted         |
| All               | 166527          | 525.1 | 143977         | 236.0 | 1.78 (1.77-1.80)      | 1.82 (1.80-1.83) |
| Urbanization      |                 |       |                |       |                       |                  |
| 1, highest        | 38051           | 448.8 | 34168          | 213.5 | 1.74 (1.71-1.77)      | 1.76 (1.77-1.82) |
| 2                 | 55765           | 540.1 | 45254          | 240.5 | 1.79 (1.77-1.81)      | 1.83 (1.80-1.85) |
| 3                 | 55177           | 558.8 | 50810          | 248.9 | 1.79 (1.76-1.81)      | 1.81 (1.79-1.84) |
| 4                 | 17534           | 578.0 | 13745          | 237.2 | 1.86 (1.82-1.90)      | 1.86 (1.82-1.90) |
| Parental job      |                 |       |                |       |                       |                  |
| Public Employees  | 12995           | 452.5 | 11371          | 232.8 | 1.66 (1.62-1.71)      | 1.72 (1.68-1.77) |
| Business          | 87566           | 563.3 | 73728          | 260.6 | 1.74 (1.73-1.76)      | 1.79 (1.77-1.80) |
| Industry          | 24480           | 514.6 | 20844          | 238.6 | 1.76 (1.72-1.79)      | 1.81 (1.78-1.85) |
| Agriculture       | 13960           | 469.5 | 11839          | 217.5 | 1.73 (1.68-1.77)      | 1.73 (1.69-1.78) |
| Fishery           | 5629            | 559.0 | 4951           | 249.2 | 1.79 (1.72-1.86)      | 1.82 (1.75-1.89) |
| Other             | 21897           | 480.6 | 21244          | 181.8 | 2.04 (2.00-2.08)      | 2.07 (2.03-2.11) |
| Allergic rhinitis |                 |       |                |       |                       |                  |
|                   | Yes (N=1062903) |       | No (N=1062903) |       | Hazard ratio (95% CI) |                  |
|                   | n               | Rate  | n              | Rate  | Crude                 | Adjusted         |
| All               | 898468          | 322.4 | 768339         | 169.9 | 1.61 (1.60-1.61)      | 1.68 (1.68-1.69) |
| Urbanization      |                 |       |                |       |                       |                  |
| 1, highest        | 246689          | 288.2 | 180784         | 154.9 | 1.60 (1.59-1.61)      | 1.65 (1.64-1.66) |
| 2                 | 287237          | 329.1 | 239453         | 172.2 | 1.62 (1.61-1.63)      | 1.69 (1.68-1.69) |
| 3                 | 292292          | 344.3 | 270437         | 177.9 | 1.62 (1.61-1.63)      | 1.70 (1.69-1.70) |
| 4                 | 72250           | 345.9 | 77665          | 175.1 | 1.63 (1.62-1.65)      | 1.71 (1.70-1.73) |
| Parental job      |                 |       |                |       |                       |                  |
| Public Employees  | 90154           | 282.3 | 62200          | 158.9 | 1.55 (1.53-1.56)      | 1.62 (1.61-1.64) |
| Business          | 469670          | 338.1 | 371634         | 186.8 | 1.55 (1.54-1.56)      | 1.63 (1.62-1.63) |
| Industry          | 137646          | 317.1 | 116754         | 169.8 | 1.59 (1.57-1.60)      | 1.68 (1.66-1.69) |
| Agriculture       | 68166           | 295.4 | 72793          | 156.4 | 1.59 (1.58-1.61)      | 1.69 (1.67-1.70) |
| Fishery           | 29174           | 348.5 | 27483          | 183.7 | 1.59 (1.56-1.61)      | 1.66 (1.63-1.68) |
| Other             | 103658          | 314.5 | 117475         | 140.3 | 1.86 (1.84-1.87)      | 1.99 (1.97-2.01) |

Rate, per 1000 person-years; CI, confidence interval; other, joblessness or financial fragility.

Supplement Table S2. Incidence of acute bronchiolitis, asthma cohort to non-asthma cohort hazard ratio and allergic rhinitis cohort to non-allergic rhinitis cohort hazard ratio by urbanization level of resident and parental job

| Variable         | Asthma            |      |                |      |                       |                  |
|------------------|-------------------|------|----------------|------|-----------------------|------------------|
|                  | Yes (N=192126)    |      | No (N=192126)  |      | Hazard ratio (95% CI) |                  |
|                  | n                 | Rate | n              | Rate | Crude                 | Adjusted         |
| All              | 54222             | 42.7 | 41365          | 28.5 | 1.45 (1.43-1.47)      | 1.50 (1.48-1.52) |
| Urbanization     |                   |      |                |      |                       |                  |
| 1, highest       | 11498             | 38.8 | 9235           | 25.8 | 1.44 (1.40-1.48)      | 1.56 (1.52-1.61) |
| 2                | 18008             | 43.9 | 13068          | 29.3 | 1.44 (1.40-1.47)      | 1.50 (1.46-1.53) |
| 3                | 18973             | 45.3 | 15522          | 31.1 | 1.42 (1.39-1.45)      | 1.46 (1.43-1.49) |
| 4                | 5743              | 39.8 | 3540           | 23.8 | 1.62 (1.56-1.69)      | 1.58 (1.52-1.65) |
| Parental job     |                   |      |                |      |                       |                  |
| Public Employees | 3839              | 34.4 | 3106           | 25.8 | 1.33 (1.26-1.39)      | 1.43 (1.36-1.50) |
| Business         | 29686             | 48.2 | 22436          | 32.9 | 1.41 (1.39-1.44)      | 1.49 (1.46-1.52) |
| Industry         | 7529              | 40.1 | 5902           | 28.4 | 1.38 (1.33-1.42)      | 1.46 (1.42-1.52) |
| Agriculture      | 4245              | 31.1 | 2917           | 20.2 | 1.51 (1.44-1.59)      | 1.55 (1.48-1.62) |
| Fishery          | 1852              | 43.6 | 1438           | 28.4 | 1.45 (1.36-1.56)      | 1.44 (1.34-1.54) |
| Other            | 7071              | 40.4 | 5566           | 22.5 | 1.70 (1.64-1.76)      | 1.73 (1.67-1.79) |
| Variable         | Allergic rhinitis |      |                |      |                       |                  |
|                  | Yes (N=1062903)   |      | No (N=1062903) |      | Hazard ratio (95% CI) |                  |
|                  | n                 | Rate | n              | Rate | Crude                 | Adjusted         |
| All              | 253865            | 29.5 | 191399         | 20.1 | 1.42 (1.41-1.43)      | 1.46 (1.45-1.47) |
| Urbanization     |                   |      |                |      |                       |                  |
| 1, highest       | 66196             | 26.8 | 42921          | 18.5 | 1.42 (1.40-1.44)      | 1.43 (1.41-1.45) |
| 2                | 80280             | 29.6 | 59582          | 20.3 | 1.41 (1.39-1.42)      | 1.45 (1.43-1.46) |
| 3                | 87990             | 32.4 | 71804          | 22.0 | 1.42 (1.40-1.43)      | 1.47 (1.46-1.49) |
| 4                | 19399             | 27.4 | 17092          | 17.1 | 1.53 (1.50-1.56)      | 1.57 (1.54-1.60) |
| Parental job     |                   |      |                |      |                       |                  |
| Public Employees | 22958             | 23.5 | 14328          | 17.3 | 1.35 (1.32-1.37)      | 1.41 (1.38-1.44) |
| Business         | 139856            | 32.8 | 100568         | 23.7 | 1.35 (1.34-1.36)      | 1.40 (1.39-1.41) |
| Industry         | 37374             | 28.2 | 27692          | 19.0 | 1.43 (1.40-1.45)      | 1.50 (1.47-1.52) |
| Agriculture      | 17470             | 22.9 | 15464          | 14.8 | 1.50 (1.46-1.53)      | 1.56 (1.53-1.59) |
| Fishery          | 8430              | 30.9 | 6334           | 18.8 | 1.56 (1.51-1.62)      | 1.63 (1.57-1.68) |
| Other            | 27777             | 27.5 | 27013          | 16.9 | 1.57 (1.53-1.59)      | 1.66 (1.63-1.69) |

Rate, per 1000 person-years; CI, confidence interval; other, joblessness or financial fragility.

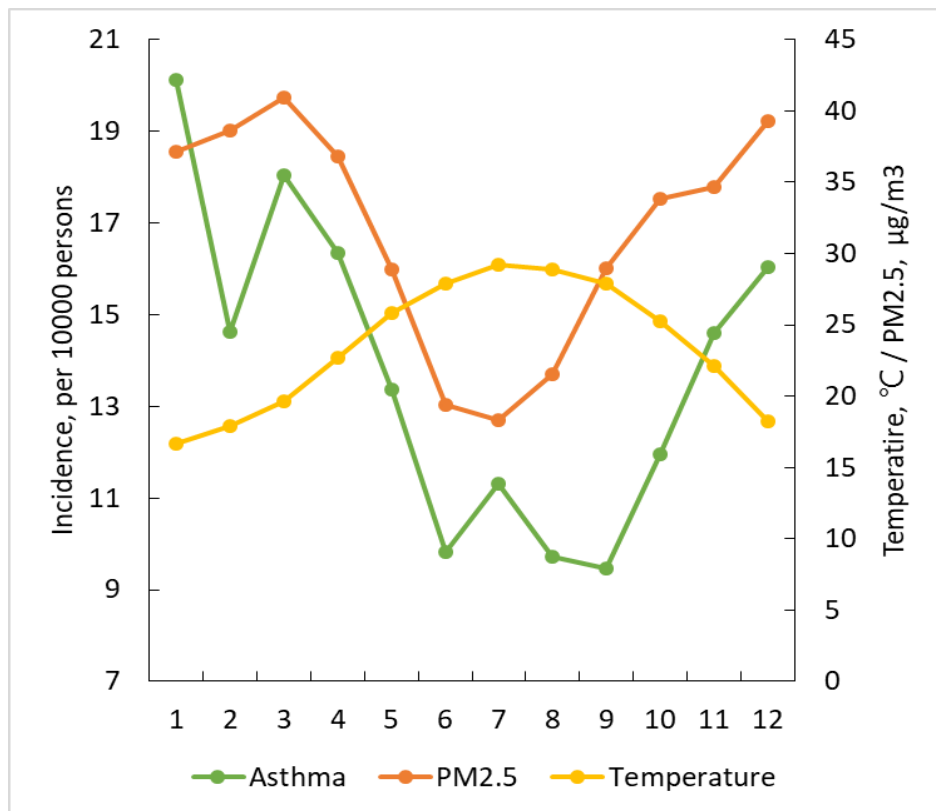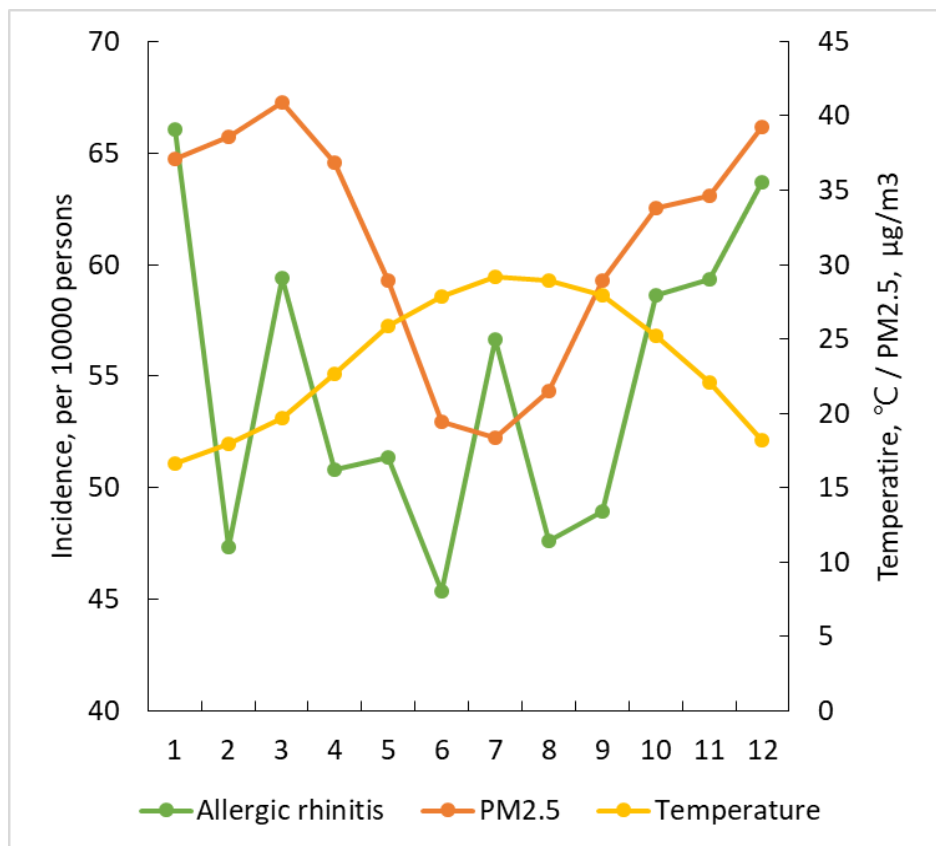

**Supplement Figure S1.** Monthly average incident childhood asthma and allergic rhinitis by monthly average temperature and PM<sub>2.5</sub> level in 2006–2016 in Taiwan
